# Supplementary material for: Thrombin Preconditioning Improves the Therapeutic Efficacy of Mesenchymal Stem Cells in Severe Intraventricular Hemorrhage Induced Neonatal Rats
Source: MDPI journal article supplement (doi:10.3390/ijms23084447), 2022-04-18
Supplement: s1 [file s1]

## Supplementary Materials

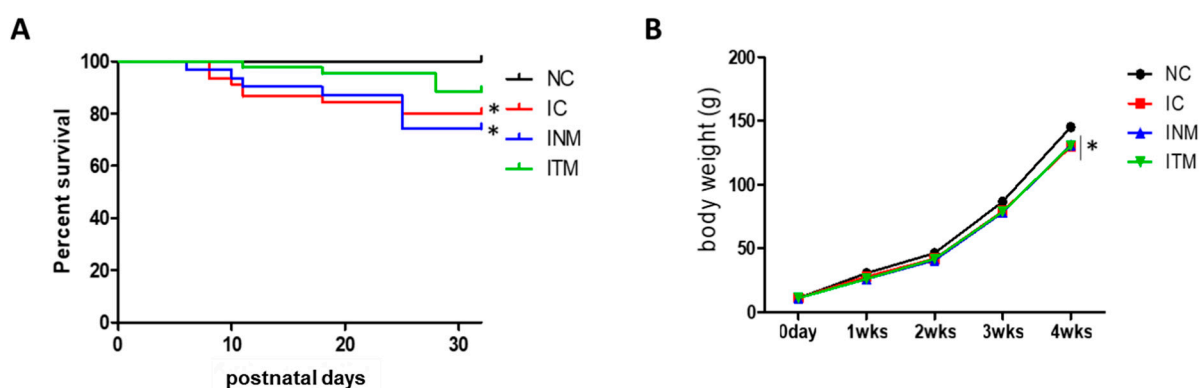

**Figure S1.** (A) Survival rate and (B) body weight growth curve {initial number of animals (- the number of dead animals) = 18 (-0), 36 (-7), 31 (-8), 32 (-4) in the NC group, IC group, INM group and ITM group, respectively}. The measured values are expressed as mean  $\pm$  SEM. \* $p < 0.05$  versus NC. NC, normal control; IC, IVH control; INM, IVH with transplantation of naïve MSCs; ITM, IVH with transplantation of thrombin preconditioned MSCs.

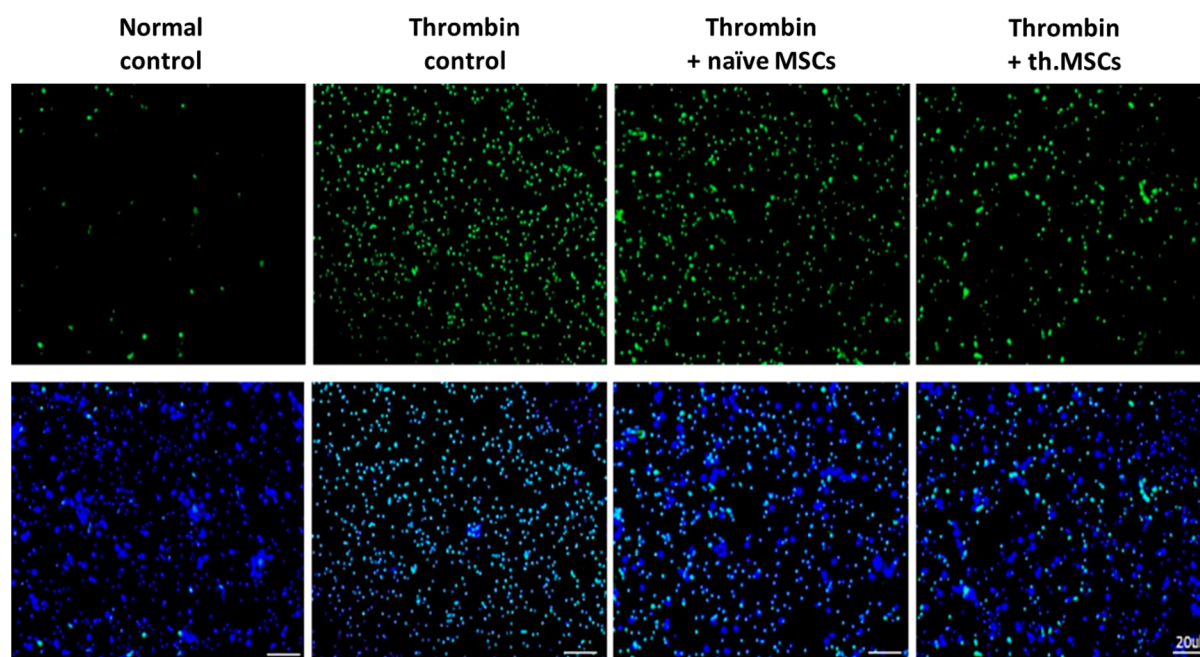

**Figure S2.** Enlarged images shown in Figure 1D.
